# Supplementary material
Source: publisher figshare collection journal article supplement (https://gsajournals.figshare.com/ndownloader/files/20973669)
Supplement: Supplementary file 1 [file 20973669]

## Sheet: Table S3
Table S3	M. jurtina genome characteristics
Property	Minimum	Maximum
Heterozygosity	0.0189416	0.019291
Genome Haploid Length	573,649,617 bp	576,419,021 bp
Genome Repeat Length	433,786,156 bp	435,880,342 bp
Genome Unique Length	139,863,460 bp	140,538,678 bp
Model Fit	0.960281	0.987053
Read Error Rate	0.00263087	0.00263087
